# Supplementary material
Source: PubMed Central journal article supplement (PMC4997884)
Supplement: AAC.00544-16_zac009165458so1.pdf [file AAC.00544-16_zac009165458so1.pdf]

**A Telomeric Cluster of Antimony Resistance Genes on  
Chromosome 34 of *Leishmania infantum***

**- *supplemental material* -**

Paloma Tejera Nevado, Eugenia Bifeld, Katharina Höhn and Joachim Clos#

Bernhard Nocht Institute for Tropical Medicine, Hamburg, Germany

*Running head: Leishmania Drug Resistance Gene Cluster*

#Address correspondence to Joachim Clos, clos@bnitm.de

Table S1. Oligonucleotides (Sigma Aldrich) used for mutagenesis of ARM58 by PCR (1) to exchange the cysteine residues in positions 27, 145 or/and 271 to serine residues.

| Primer ID       | Sequence (5'-3')            |
|-----------------|-----------------------------|
| ARM58-C27S-fwd  | CGGAGCTTCGACGGCCGCGACATTC   |
| ARM58-C27S-rev  | GTAGCACTCCTGATACGC          |
| ARM58-C145S-fwd | CGCAGCTTCAAGAACGGCAATGGGCTG |
| ARM58-C145S-rev | GTAGATCTTATCGTATGG          |
| ARM58-C271Sfwd  | AAGAGCTTCAAGGAGCACGGCAAC    |
| ARM58-C271S-rev | GAACACGTGGTCTGGTGTG         |

1. **Hombach A, Ommen G, Chrobak M, Clos J.** 2013. The Hsp90-Sti1 Interaction is Critical for *Leishmania donovani* Proliferation in Both Life Cycle Stages. *Cell Microbiol* **15**:585-600.

**A**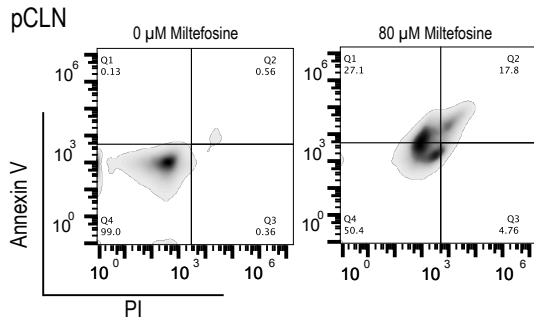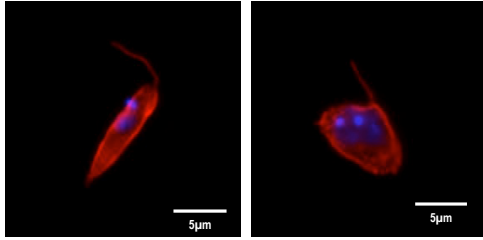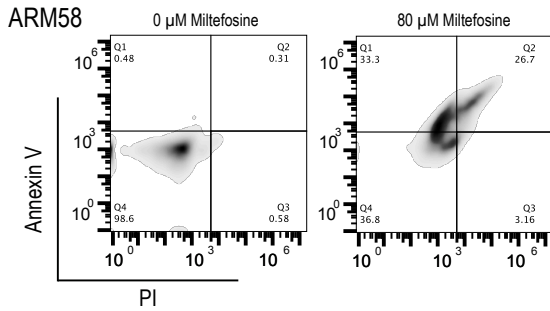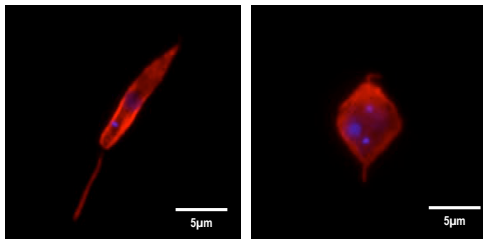

Figure S1. Quantification of apoptosis and cell death by FACS analysis with PI and AnnexinV. (A) *L. donovani* promastigotes with pCLN or ARM58 transgenes were exposed to 80  $\mu$ M miltefosine for 72 hours. The cells were stained with propidium iodide and Annexin V to determine the cell status. Data correspond to Table 1

**B**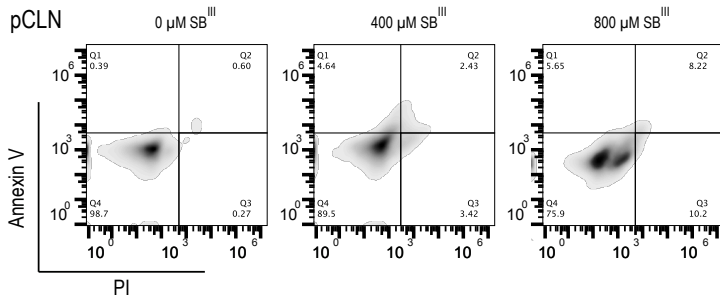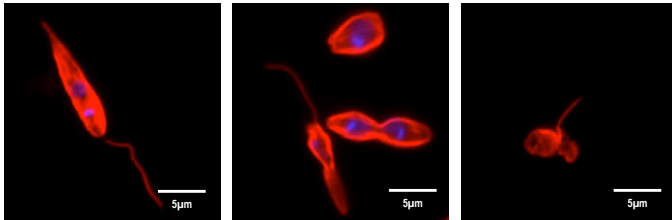

ARM58

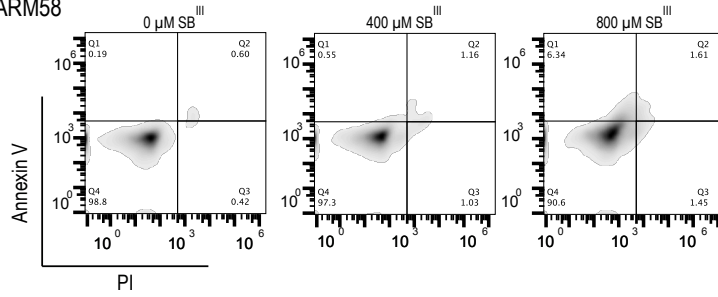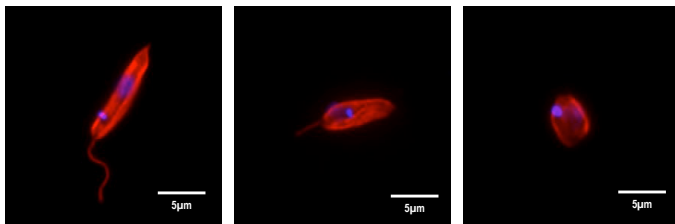

(B) As panel A, but promastigotes were challenged with 400 or 800  $\mu\text{M}$  trivalent antimony. Data correspond to Table 1
